# Supplementary material for: SETBP1 accumulation induces P53 inhibition and genotoxic stress in neural progenitors underlying neurodegeneration in Schinzel-Giedion syndrome
Source: PubMed Central journal article supplement (PMC8245514; doi:10.1038/s41467-021-24391-3), 2021-06-30
Supplement: 41467_2021_24391_MOESM9_ESM.pdf [file 41467_2021_24391_MOESM9_ESM.pdf]

## Reporting Summary

Nature Research wishes to improve the reproducibility of the work that we publish. This form provides structure for consistency and transparency in reporting. For further information on Nature Research policies, see our [Editorial Policies](#) and the [Editorial Policy Checklist](#).

### Statistics

For all statistical analyses, confirm that the following items are present in the figure legend, table legend, main text, or Methods section.

n/a Confirmed

- The exact sample size ( $n$ ) for each experimental group/condition, given as a discrete number and unit of measurement
- A statement on whether measurements were taken from distinct samples or whether the same sample was measured repeatedly
- The statistical test(s) used AND whether they are one- or two-sided  
*Only common tests should be described solely by name; describe more complex techniques in the Methods section.*
- A description of all covariates tested
- A description of any assumptions or corrections, such as tests of normality and adjustment for multiple comparisons
- A full description of the statistical parameters including central tendency (e.g. means) or other basic estimates (e.g. regression coefficient) AND variation (e.g. standard deviation) or associated estimates of uncertainty (e.g. confidence intervals)
- For null hypothesis testing, the test statistic (e.g.  $F$ ,  $t$ ,  $r$ ) with confidence intervals, effect sizes, degrees of freedom and  $P$  value noted  
*Give  $P$  values as exact values whenever suitable.*
- For Bayesian analysis, information on the choice of priors and Markov chain Monte Carlo settings
- For hierarchical and complex designs, identification of the appropriate level for tests and full reporting of outcomes
- Estimates of effect sizes (e.g. Cohen's  $d$ , Pearson's  $r$ ), indicating how they were calculated

*Our web collection on [statistics for biologists](#) contains articles on many of the points above.*

### Software and code

Policy information about [availability of computer code](#)

Data collection

Data analysis

For manuscripts utilizing custom algorithms or software that are central to the research but not yet described in published literature, software must be made available to editors and reviewers. We strongly encourage code deposition in a community repository (e.g. GitHub). See the Nature Research [guidelines for submitting code & software](#) for further information.

## Data

Policy information about [availability of data](#)

All manuscripts must include a [data availability statement](#). This statement should provide the following information, where applicable:

- Accession codes, unique identifiers, or web links for publicly available datasets
- A list of figures that have associated raw data
- A description of any restrictions on data availability

Genomic data are available GEO accession GSE171266, (go to <https://www.ncbi.nlm.nih.gov/geo/query/acc.cgi?acc=GSE171266>)

## Field-specific reporting

Please select the one below that is the best fit for your research. If you are not sure, read the appropriate sections before making your selection.

- Life sciences       Behavioural & social sciences       Ecological, evolutionary & environmental sciences

For a reference copy of the document with all sections, see [nature.com/documents/nr-reporting-summary-flat.pdf](https://www.nature.com/documents/nr-reporting-summary-flat.pdf)

## Life sciences study design

All studies must disclose on these points even when the disclosure is negative.

|                 |                                                                                                                                                                                                                                                                                                                                                                                                                                                                                                                                                                                                                                                                       |
|-----------------|-----------------------------------------------------------------------------------------------------------------------------------------------------------------------------------------------------------------------------------------------------------------------------------------------------------------------------------------------------------------------------------------------------------------------------------------------------------------------------------------------------------------------------------------------------------------------------------------------------------------------------------------------------------------------|
| Sample size     | No statistical methods were used to pre-determine sample sizes, but our sample sizes are similar to those reported in previous publications (see Conforti P. et al., 2020; Inak G. et al., 2021; Xie Y. et al., 2020; for experiments concerning isogenic cell line derivation, PSCs characterization and 2D differentiation, and Inak G. et al; Klaus J. et al. 2019 for experiments concerning organoids). We used independent control lines and isogenic control lines to increase the robustness of the results. However, sample size per group and condition is equal to or greater than generally accepted standard of three biological replications per group. |
| Data exclusions | No data were excluded                                                                                                                                                                                                                                                                                                                                                                                                                                                                                                                                                                                                                                                 |
| Replication     | We repeated all experiments using at least three biological replicates over distinct independent experiments. We specified the number of biological replicates and independent experiments in the respective figure legends.                                                                                                                                                                                                                                                                                                                                                                                                                                          |
| Randomization   | We plated the cells in a random distribution onto cell culture and multi-well plate positions, and randomly assigned them to experimental groups. We performed cell counting on random microscope view fields.                                                                                                                                                                                                                                                                                                                                                                                                                                                        |
| Blinding        | The investigator who performed RNA sequencing were blinded to the genotype. Other data collection and analyses were not performed blind to the conditions due to obvious differences between groups. The same results have been repeated by multiple members of the research team.                                                                                                                                                                                                                                                                                                                                                                                    |

## Reporting for specific materials, systems and methods

We require information from authors about some types of materials, experimental systems and methods used in many studies. Here, indicate whether each material, system or method listed is relevant to your study. If you are not sure if a list item applies to your research, read the appropriate section before selecting a response.

### Materials & experimental systems

| n/a                                 | Involved in the study                                           |
|-------------------------------------|-----------------------------------------------------------------|
| <input type="checkbox"/>            | <input checked="" type="checkbox"/> Antibodies                  |
| <input type="checkbox"/>            | <input checked="" type="checkbox"/> Eukaryotic cell lines       |
| <input checked="" type="checkbox"/> | <input type="checkbox"/> Palaeontology and archaeology          |
| <input checked="" type="checkbox"/> | <input type="checkbox"/> Animals and other organisms            |
| <input type="checkbox"/>            | <input checked="" type="checkbox"/> Human research participants |
| <input checked="" type="checkbox"/> | <input type="checkbox"/> Clinical data                          |
| <input checked="" type="checkbox"/> | <input type="checkbox"/> Dual use research of concern           |

### Methods

| n/a                                 | Involved in the study                              |
|-------------------------------------|----------------------------------------------------|
| <input checked="" type="checkbox"/> | <input type="checkbox"/> ChIP-seq                  |
| <input type="checkbox"/>            | <input checked="" type="checkbox"/> Flow cytometry |
| <input checked="" type="checkbox"/> | <input type="checkbox"/> MRI-based neuroimaging    |

## Antibodies

|                 |                                                                                                                                                                                                   |
|-----------------|---------------------------------------------------------------------------------------------------------------------------------------------------------------------------------------------------|
| Antibodies used | The antibodies used in this work are listed with the details (producer, species or origin, dilution of usage, and RRID) in the Supplementary Table 2.                                             |
| Validation      | The antibodies used in this work are all commercial and widely tested in literature for the proposed assay.<br><br>Mouse monoclonal anti-TRA-1-60: Sigma-Aldrich, Cat# MAB4360, RRID: AB_11211864 |

Culture of human embryonic stem cells on human and mouse feeder cells.

Gautam Dravid, Holly Hammond, Linzhao Cheng, 2006. DOI: 10.1385/1-59745-046-4:91

Mouse monoclonal anti-SOX2 (Clone # 245610): R&D system, Cat# MAB2018, RRID:AB\_358009

Generation of the human induced pluripotent stem cell (hiPSC) line PSMi006-A from a patient affected by an autosomal recessive form of long QT syndrome type 1

Manuela Mura et al., 2019. DOI: 10.1385/1-59745-046-4:91

Rabbit polyclonal anti-Oct4: Abcam, Cat#ab18976, RRID:AB\_444714

Derivation of Pluripotent Stem Cells with In Vivo Embryonic and Extraembryonic Potency.

Yang Y et al., 2017. DOI: 10.1016/j.cell.2017.02.005.

Rabbit polyclonal anti-Nanog: Abcam, Cat#ab106465, RRID:AB\_10858563

RNA Helicase DDX5 Inhibits Reprogramming to Pluripotency by miRNA-Based Repression of RYBP and its PRC1-Dependent and -Independent Functions

Huanhuan Li et al., 2017. DOI: 10.1016/j.stem.2016.12.002

Rabbit polyclonal anti-Tubulin  $\beta$ -3: Covance, Cat#PRB-435P, RRID:AB\_291637

Driving Neuronal Differentiation through Reversal of an ERK1/2-miR-124-SOX9 Axis Abrogates Glioblastoma Aggressiveness

Hanna Sabelström et al., 2019. DOI: 10.1016/j.celrep.2019.07.071

Rabbit polyclonal anti-Pax6 (Clone Poly19013): Covance, Cat# PRB-278P, RRID:AB\_291612

Merging organoid and organ-on-a-chip technology to generate complex multi-layer tissue models in a human retina-on-a-chip platform

Kevin Achberger et al., 2019. DOI: 10.7554/eLife.46188

Mouse monoclonal anti-Actin,  $\alpha$ -Smooth Muscle: Sigma-Aldrich, Cat#A5228, RRID:AB\_262054

Tissue-Engineered Vascular Grafts with Advanced Mechanical Strength from Human iPSCs

Jiesi Luo et al., 2020. DOI: 10.1016/j.stem.2019.12.012

Rabbit polyclonal anti-Foxa2: Abcam, Cat#ab40874, RRID:AB\_732411

Cerebral dopamine neurotrophic factor is essential for enteric neuronal development, maintenance, and regulation of gastrointestinal transit

Alcmène Chalazonitis et al., 2020. DOI: 10.1002/cne.24901

Mouse monoclonal anti-Nestin (clone 10C2): Sigma-Aldrich, Cat# MAB5326, RRID:AB\_2251134

Subventricular zone neural progenitors from rapid brain autopsies of elderly subjects with and without neurodegenerative disease

Brian W Leonard et al., 2009. DOI: 10.1002/cne.22040

Rabbit polyclonal anti-phospho-Histone H3 (Ser10): Sigma-Aldrich, Cat#06-570, RRID:AB\_310177

Tight junction protein occludin regulates progenitor Self-Renewal and survival in developing cortex

Raphael M Bendriem et al., 2019. DOI: 10.7554/eLife.49376

Rabbit polyclonal anti-Foxg1: Abcam, Cat#ab18259, AB\_732415

Mechanisms of hyperexcitability in Alzheimer's disease hiPSC-derived neurons and cerebral organoids vs isogenic controls

Swagata Ghatak et al., 2019. DOI: 10.7554/eLife.50333

Mouse monoclonal anti-ZO1 (clone ZO1-1A12), FITC: Thermo Fisher Scientific, Cat#33-9111, RRID:AB\_2533148

A multiplex high-throughput gene expression assay to simultaneously detect disease and functional markers in induced pluripotent stem cell-derived retinal pigment epithelium

Marc Ferrer et al., 2014. DOI: 10.5966/sctm.2013-0192

Rabbit monoclonal anti-Phospho-Histone H2A.X (Ser139) (clone 20E3): Cell Signaling Technology, Catt#9718, RRID:AB\_2118009

WB: PARP1 inhibitors trigger innate immunity via PARP1 trapping-induced DNA damage response

Chiho Kim et al., 2020. DOI: 10.7554/eLife.60637

IF: A high-throughput small molecule screen identifies farrerol as a potentiator of CRISPR/Cas9-mediated genome editing

Weina Zhang et al., 2020. DOI: 10.7554/eLife.56008

Rabbit polyclonal anti-Cleaved Caspase-3 (Asp175): Cell Signaling Technology, Cat#9661, RRID:AB\_2341188

mTOR signaling regulates the morphology and migration of outer radial glia in developing human cortex

Madeline G Andrews et al., 2020. DOI: 10.7554/eLife.58737

Rabbit polyclonal anti-Catnexus: Sigma-Aldrich, Cat#C4731, RRID:AB\_476845

PI4KB on Inclusion Bodies Formed by ER Membrane Remodeling Facilitates Replication of Human Parainfluenza Virus Type 3

Zhifei Li et al., 2019. DOI: 10.1016/j.celrep.2019.10.052

Chicken polyclonal anti-GFP: Thermo Fisher Scientific, Cat#A10262, RRID:AB\_2534023

Maturation of spinal motor neurons derived from human embryonic stem cells

Tomonori Takazawa et al., 2012. DOI: 10.1371/journal.pone.0040154

- Chicken polyclonal anti-Tbr1: Sigma-Aldrich, Cat# AB2261, RRID:AB\_10615497  
Two microcephaly-associated novel missense mutations in CASK specifically disrupt the CASK-neurexin interaction  
Leslie E W LaConte et al., 2018. DOI: 10.1007/s00439-018-1874-3
- Chicken polyclonal anti-MAP2: Abcam, Cat#ab92434, RRID:AB\_2138147  
Cellular alterations identified in pluripotent stem cell-derived midbrain spheroids generated from a female patient with progressive external ophthalmoplegia and parkinsonism who carries a novel variation (p.Q811R) in the POLG1 gene  
Margarita Chumarina et al., 2019. DOI: 10.1186/s40478-019-0863-7
- Rabbit monoclonal anti-SET/TAF-I (clone EPR12973): Abcam, Cat#ab181990, RRID:AB\_2737445  
A Membraneless Organelle Associated with the Endoplasmic Reticulum Enables 3'UTR-Mediated Protein-Protein Interactions  
Weirui Ma and Christine Mayr, 2018. DOI: 10.1016/j.cell.2018.10.007
- Rabbit polyclonal anti-Setbp1: Proteintech, Cat#16841-1-AP, RRID:AB\_2185750  
Somatic SETBP1 mutations in myeloid malignancies  
Hideki Makishima et al., 2013. DOI: 10.1038/ng.2696
- Mouse monoclonal anti-PP2A, C subunit (clone 1D6): Sigma-Aldrich, Cat#05-421, RRID:AB\_309726  
Recurrent SETBP1 mutations in atypical chronic myeloid leukemia  
Rocco Piazza et al., 2013. DOI: 10.1038/ng.2495
- Rabbit monoclonal anti-Ki-67 (Clone SP6): Immunological Sciences, Cat# MAB-90948  
<http://www.immunologicalsciences.com/p134868/KI-67-MAB-90948>
- Mouse monoclonal anti-p-PP2A-C $\alpha$ / $\beta$  (Tyr307) (clone F-8): Santa Cruz Biotechnology, Cat#sc-271903, RRID:AB\_10611810  
Hypoxia modulates protein phosphatase 2A through HIF-1 $\alpha$  dependent and independent mechanisms in human aortic smooth muscle cells and ventricular cardiomyocytes  
Ismail Suliman Elgenaidi and James Paul Spiers, 2019. DOI: 10.1111/bph.14648
- Rabbit monoclonal anti-AKT (clone C67E7): Cell Signaling Technology, Cat#4691, RRID:AB\_915783  
The peripheral CB 1 receptor antagonist JD5037 attenuates liver fibrosis via a CB 1 receptor/ $\beta$ -arrestin1/Akt pathway  
Siwei Tan et al., 2020. DOI: 10.1111/bph.15010
- Rabbit polyclonal anti-Phospho-Akt (Ser473): Cell Signaling Technology, Cat#9271, RRID:AB\_329825  
Three-dimensional growth of breast cancer cells potentiates the anti-tumor effects of unacylated ghrelin and AZP-531  
CheukMan C Au et al., 2020. DOI: 10.7554/eLife.56913
- Rabbit polyclonal anti-Phospho-Akt (Thr308): Cell Signaling Technology, Cat#9275, RRID:AB\_329828  
Trimethylamine N-Oxide Binds and Activates PERK to Promote Metabolic Dysfunction  
Sifan Chen et al., 2019. DOI: 10.1016/j.cmet.2019.08.021
- Rabbit polyclonal anti-Histone H3: Abcam, Cat# ab1791, RRID:AB\_302613  
The integrated stress response induces R-loops and hinders replication fork progression  
Josephine Ann Mun Yee Choo et al., 2020. DOI: 10.1038/s41419-020-2727-2
- Mouse monoclonal anti-Actin antibody (clone AC-40): Sigma-Aldrich, Cat#A3853, RRID:AB\_262137  
SETD2 mutation in renal clear cell carcinoma suppress autophagy via regulation of ATG12  
Patricia González-Rodríguez et al., 2020. DOI: 10.1038/s41419-020-2266-x
- Rabbit monoclonal anti-ATM (clone D2E2): Cell Signaling Technology, Cat#2873, RRID:AB\_2062659  
FBXW7 Confers Radiation Survival by Targeting p53 for Degradation  
Danrui Cui et al., 2020. DOI: 10.1016/j.celrep.2019.12.032
- Mouse monoclonal anti-Phospho-ATM (Ser1981) (clone 10H11): Thermo Fisher Scientific, Cat#MA1-2020, RRID:AB\_1086244  
2-Hydroxyethyl methacrylate-induced apoptosis through the ATM- and p53-dependent intrinsic mitochondrial pathway  
Helmut Schweikl et al., 2014. DOI: 10.1016/j.biomaterials.2013.12.044
- Rabbit polyclonal anti-Chk2: Cell Signaling Technology, Cat#2662, RRID:AB\_2080793  
Insulin Signaling Regulates the FoxM1/PLK1/CENP-A Pathway to Promote Adaptive Pancreatic  $\beta$  Cell Proliferation  
Jun Shirakawa et al., 2017. DOI: 10.1016/j.cmet.2017.02.004
- Rabbit polyclonal anti-Phospho-Chk2 (Thr68): Cell Signaling Technology, Cat#2661, RRID:AB\_331479  
Torin2 Exploits Replication and Checkpoint Vulnerabilities to Cause Death of PI3K-Activated Triple-Negative Breast Cancer Cells  
Sameer S Chopra et al., 2020. DOI: 10.1016/j.cels.2019.11.001
- Mouse monoclonal anti-p53 (clone DO-1): Santa Cruz Biotechnology, Cat#sc-126, RRID:AB\_628082  
Metformin inhibits androgen-induced IGF-IR up-regulation in prostate cancer cells by disrupting membrane-initiated androgen signaling

Roberta Malaguarnera et al., 2014. DOI: 10.1210/en.2013-1925

Rabbit polyclonal anti-Acetyl-p53 (Lys382): Cell Signaling Technology, Cat#2525, RRID:AB\_330083  
SIRT1 Activation Disrupts Maintenance of Myelodysplastic Syndrome Stem and Progenitor Cells by Restoring TET2 Function  
Jie Sun et al., 2018. DOI: 10.1016/j.stem.2018.07.018

Rabbit polyclonal anti-Phospho-p53 (Ser15): Cell Signaling Technology, Cat#9284, RRID:AB\_331464  
p53 Loss in Breast Cancer Leads to Myc Activation, Increased Cell Plasticity, and Expression of a Mitotic Signature with Prognostic Value  
Angela Santoro et al., 2019. DOI: 10.1016/j.celrep.2018.12.071

Mouse monoclonal anti-Spectrin alpha chain (nonerythroid) (clone AA6): Millipore, Cat#MAB1622, RRID:AB\_11214057  
Neuronally Enriched RUFY3 Is Required for Caspase-Mediated Axon Degeneration  
Nicholas T Hertz et al., 2019. DOI: 10.1016/j.neuron.2019.05.030

Mouse monoclonal anti-Poly(ADP-ribose) (clone 10H): Enzo Life Sciences, Cat#ALX-804-220-R100, RRID:AB\_2052275  
Olaparib-induced Adaptive Response Is Disrupted by FOXM1 Targeting that Enhances Sensitivity to PARP Inhibition  
Pingping Fang et al., 2018. DOI: 10.1158/1541-7786.MCR-17-0607

PTEN (138G6) Rabbit mAb: Cell Signaling Technology, Cat#9559, RRID:AB\_390810  
Replication Study: A coding-independent function of gene and pseudogene mRNAs regulates tumour biology  
John Kerwin et al., 2020. DOI: 10.7554/eLife.51019

Rabbit phospho-S6 Ribosomal Protein (Ser235/236) Antibody: Cell Signaling Technology, Cat#2211, RRID:AB\_331679  
Dysregulation of Mitochondrial Ca<sup>2+</sup> Uptake and Sarcolemma Repair Underlie Muscle Weakness and Wasting in Patients and Mice Lacking MICU1  
Valentina Debattisti et al., 2019. DOI: 10.1016/j.celrep.2019.09.063

S6 Ribosomal Protein (5G10) Rabbit mAb: Cell Signaling Technology, Cat#2217, RRID:AB\_331355  
Dysregulation of Mitochondrial Ca<sup>2+</sup> Uptake and Sarcolemma Repair Underlie Muscle Weakness and Wasting in Patients and Mice Lacking MICU1  
Valentina Debattisti et al., 2019. DOI: 10.1016/j.celrep.2019.09.063

Rabbit phospho-mTOR (Ser2448) Antibody: Cell Signaling Technology, Cat#2971, RRID:AB\_330970  
CD74 knockout protects against LPS-induced myocardial contractile dysfunction through AMPK-Skp2-SUV39H1-mediated demethylation of BCLB  
Yuanfei Luo et al., 2020. DOI: 10.1111/bph.14959

Rabbit anti-GABA antibody: Sigma-Aldrich, Cat#A2052, RRID:AB\_477652  
The Role of Sonic Hedgehog in the Specification of Human Cortical Progenitors In Vitro  
Nevena V Radonjić et al., 2016. DOI: 10.1093/cercor/bhu183

Chicken polyclonal anti-Vimentin antibody: Abcam, Cat#ab24525, RRID:AB\_778824  
Macrophage-Derived Slit3 Controls Cell Migration and Axon Pathfinding in the Peripheral Nerve Bridge  
Xin-Peng Dun et al., 2019. DOI: 10.1016/j.celrep.2018.12.081

Anti-Doublecortin antibody: Abcam, Cat#ab18723, RRID: AB\_732011  
In vitro human stem cell derived cultures to monitor calcium signaling in neuronal development and function  
Yojet Sharma et al., 2020. DOI: 10.12688/wellcomeopenres.15626.1

NF-κB p65 (D14E12) XP® Rabbit mAb: Cell Signaling Technology, Cat#8242, RRID:AB\_10859369  
IL-1β Inhibits Connexin 43 and Disrupts Decidualization of Human Endometrial Stromal Cells Through ERK1/2 and p38 MAP Kinase  
Jie Yu et al., 2017. DOI: 10.1210/en.2017-00495.

## Eukaryotic cell lines

Policy information about [cell lines](#)

Cell line source(s)

Patients and control fibroblasts were gift from Dr. Alexander Hoischen (Radboud umc, the Netherlands). We derived iPSCs from these fibroblasts.

HEK293T: ATCC, Cat# CRL-3216.

Authentication

Fibroblasts were tested for mycoplasma, Karyotype and for the presence of expected mutations (Sanger sequencing) before their usage for reprogramming. Derived iPSCs were routinely tested for mycoplasma, stemness and pluripotency, Karyotype and for the presence of expected mutations (Sanger sequencing).

Mycoplasma contamination

Commonly misidentified lines (See [ICLAC](#) register)

## Human research participants

Policy information about [studies involving human research participants](#)

Population characteristics

Recruitment

Ethics oversight

Note that full information on the approval of the study protocol must also be provided in the manuscript.

## Flow Cytometry

### Plots

Confirm that:

- The axis labels state the marker and fluorochrome used (e.g. CD4-FITC).
- The axis scales are clearly visible. Include numbers along axes only for bottom left plot of group (a 'group' is an analysis of identical markers).
- All plots are contour plots with outliers or pseudocolor plots.
- A numerical value for number of cells or percentage (with statistics) is provided.

### Methodology

Sample preparation

Instrument

Software

Cell population abundance

Gating strategy

- Tick this box to confirm that a figure exemplifying the gating strategy is provided in the Supplementary Information.
